# Supplementary material
Source: PubMed Central journal article supplement (PMC6822094)
Supplement: jamasurg-154-e193732-s001.pdf [file jamasurg-154-e193732-s001.pdf]

## Supplementary Online Content

Smith VA, Arterburn DE, Berkowitz TSZ, et al. Association between bariatric surgery and long-term health care expenditures among veterans with severe obesity. *JAMA Surg*. Published October 30, 2019. doi:10.1001/jamasurg.2019.3732

**eTable.** Number of Patients Remaining in 4 Cost Analyses

**eFigure 1.** Flow of Surgical Patients and Matched Patients from January 1, 2000, to September 30, 2011

**eFigure 2.** Unadjusted Median VA Inpatient Expenditures for Bariatric Surgery, By Procedure Type

**eFigure 3.** Model-Estimated Trends Without Covariate Adjustment in Estimated Total Expenditures for Surgical Patients and Nonsurgical Matches

**eFigure 4.** Model-Estimated Trends Without Covariate Adjustment in Estimated Outpatient Expenditures for Surgical Patients and Nonsurgical Matches

**eFigure 5.** Model-Estimated Trends Without Covariate Adjustment in Estimated Inpatient Expenditures for Surgical Patients and Nonsurgical Matches

**eFigure 6.** Model-Estimated Trends Without Covariate Adjustment in Estimated Outpatient Pharmacy Expenditures for Surgical Patients and Nonsurgical Matches

**eFigure 7.** Model-Estimated Trends in Estimated Postsurgical Total Expenditures for Surgical Patients and Nonsurgical Matches From a Model That Adjusts for Outpatient Expenditures 13-24 Months Prior to Surgery

**eFigure 8.** Model-Estimated Trends in Estimated Total Expenditures for Surgical Patients and the Single Nonsurgical Match With the Closest Outpatient Expenditures 13-24 Months Prior to Surgery

This supplementary material has been provided by the authors to give readers additional information about their work.

**eTable.** Number of Patients Remaining in 4 Cost Analyses

| <i>Half Year</i> | <i>Surgical Cases</i> | <i>Non-Surgical Matches</i> |
|------------------|-----------------------|-----------------------------|
| -6               | 2155                  | 6433                        |
| -5               | 2256                  | 6735                        |
| -4               | 2329                  | 6953                        |
| -3               | 2391                  | 7137                        |
| -2               | 2447                  | 7303                        |
| -1               | 2498                  | 7456                        |
| 1                | 2470                  | 7449                        |
| 2                | 2446                  | 7357                        |
| 3                | 2435                  | 7270                        |
| 4                | 2421                  | 7199                        |
| 5                | 2406                  | 7118                        |
| 6                | 2402                  | 7026                        |
| 7                | 2391                  | 6924                        |
| 8                | 2374                  | 6843                        |
| 9                | 2360                  | 6739                        |
| 10               | 2342                  | 6650                        |
| 11               | 2333                  | 6549                        |
| 12               | 2192                  | 6108                        |
| 13               | 2040                  | 5615                        |
| 14               | 1870                  | 5089                        |
| 15               | 1736                  | 4703                        |
| 16               | 1618                  | 4354                        |
| 17               | 1534                  | 4089                        |
| 18               | 1415                  | 3743                        |
| 19               | 1289                  | 3410                        |
| 20               | 1190                  | 3099                        |

Note: Reasons for not contributing data in a given time period included: 1) surgery early enough in the study period to preclude obtaining data up to 3 years prior, 2) surgery late enough in the study period to preclude obtaining data up to 10 years following, 3) death, and 4) for matches, undergoing bariatric surgery.

**eFigure 1.** Flow of Surgical Patients and Matched Patients from January 1, 2000, to September 30, 2011

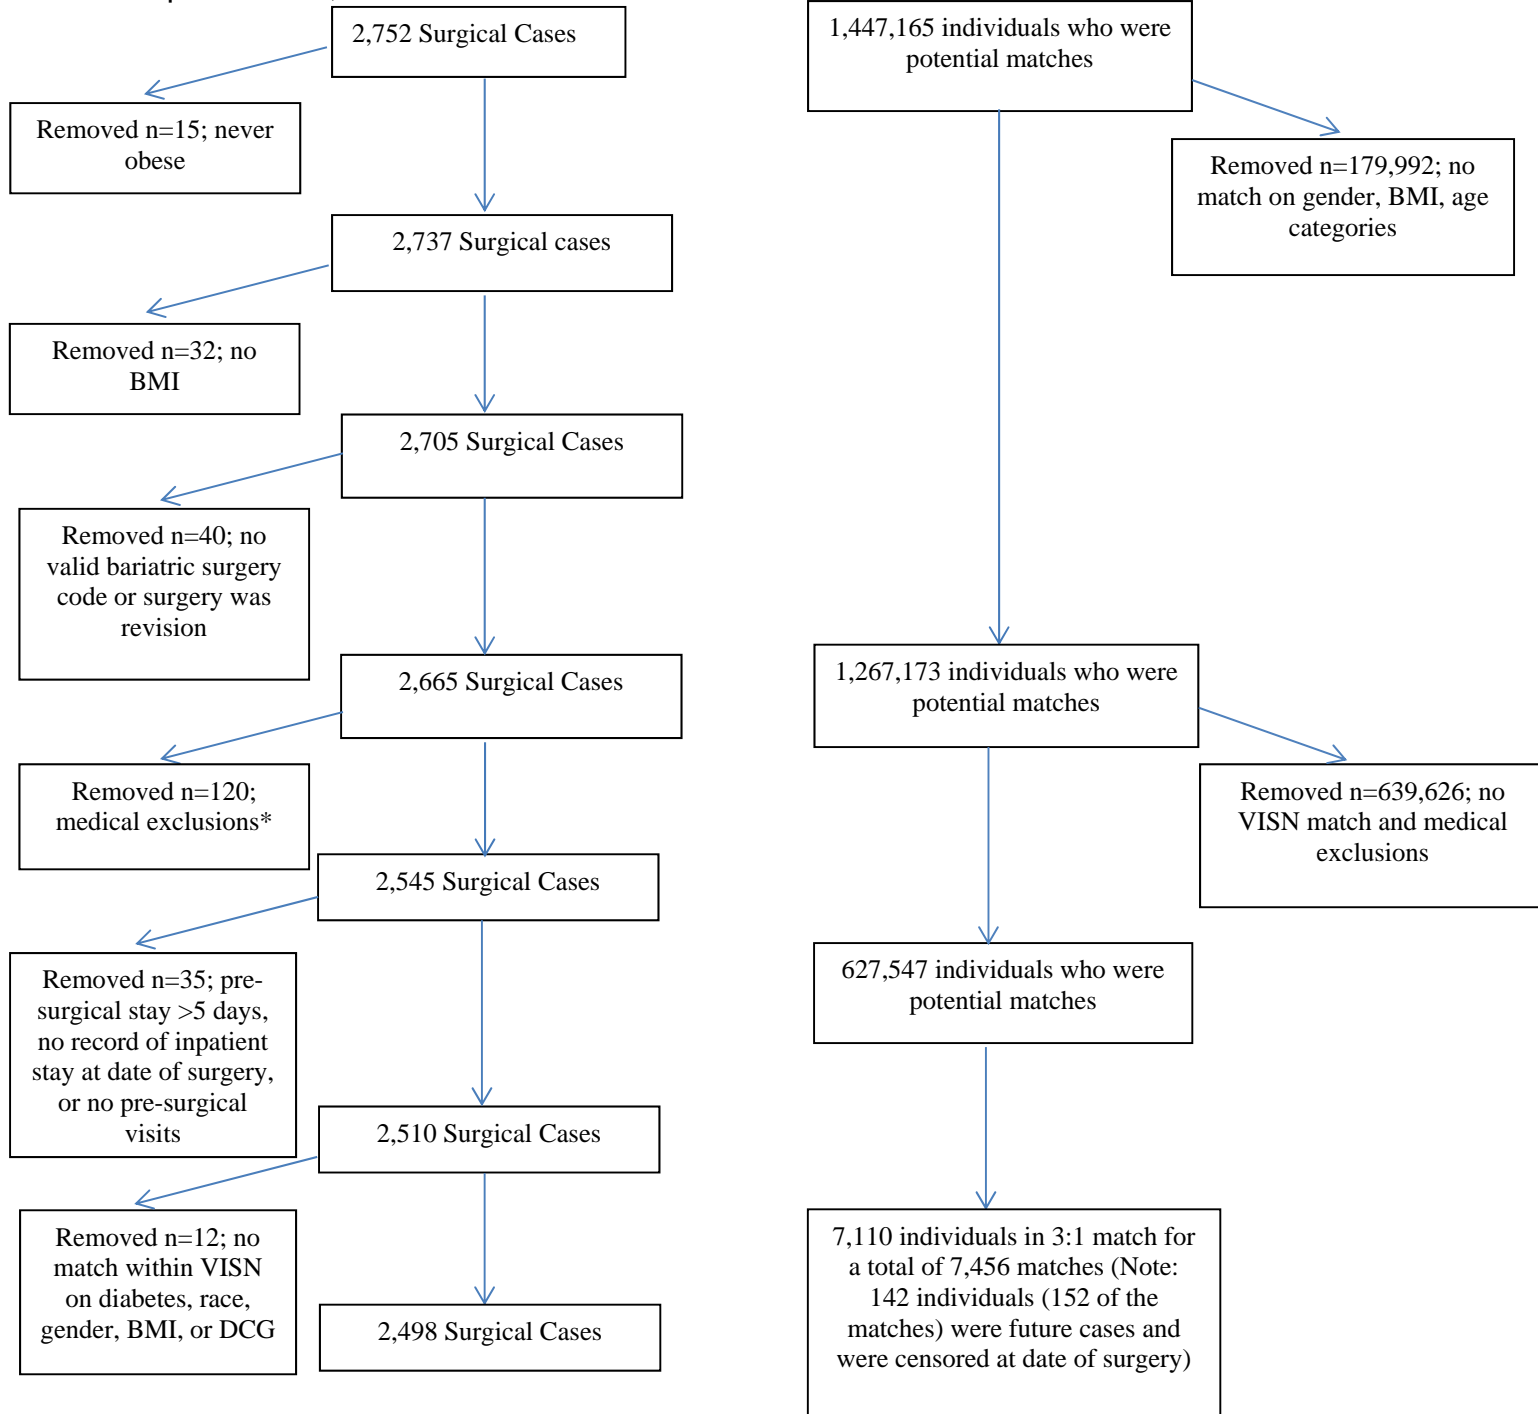

\* Medical Exclusions (n=120; patients may have multiple exclusions)

- 2 Alzheimer's disease/Dementia
- 100 Cancer
- 12 Crohn's disease/Inflammatory bowel disease
- 3 End-stage renal disease
- 0 Gestational diabetes mellitus
- 1 Peritoneal effusion
- 6 Pregnancy

**eFigure 2.** Unadjusted Median VA Inpatient Expenditures for Bariatric Surgery, By Procedure Type

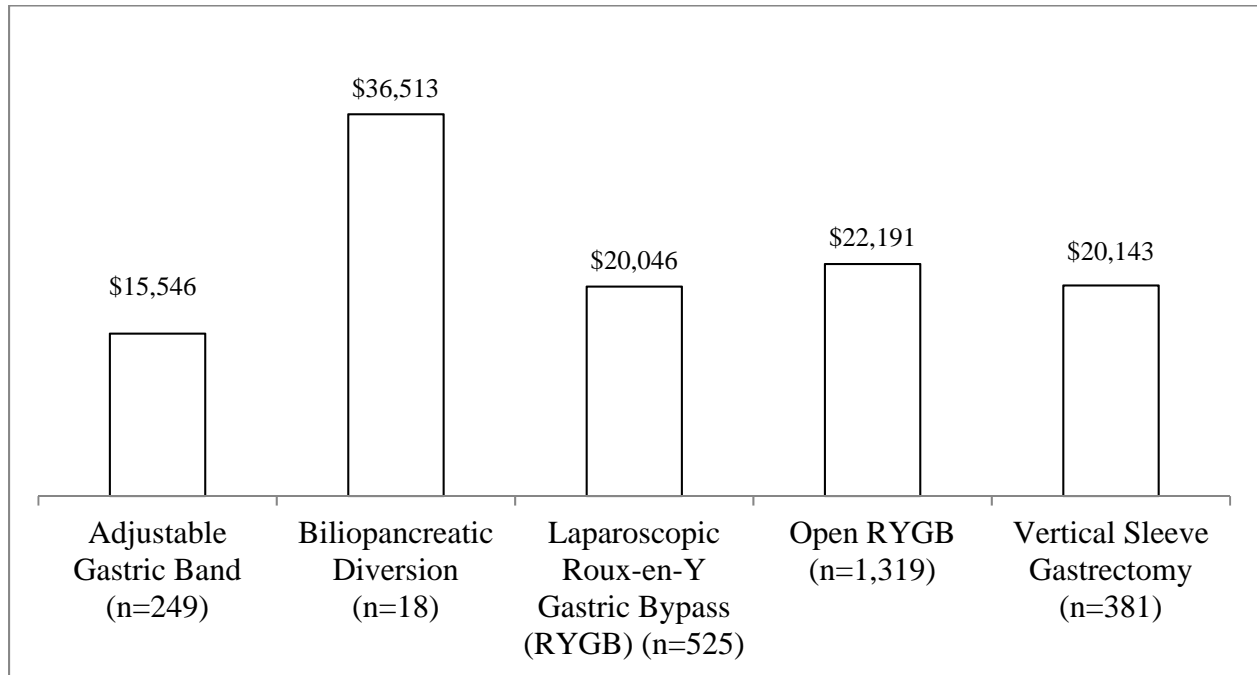

**eFigure 3.** Model-Estimated Trends Without Covariate Adjustment in Estimated Total Expenditures for Surgical Patients and Nonsurgical Matches

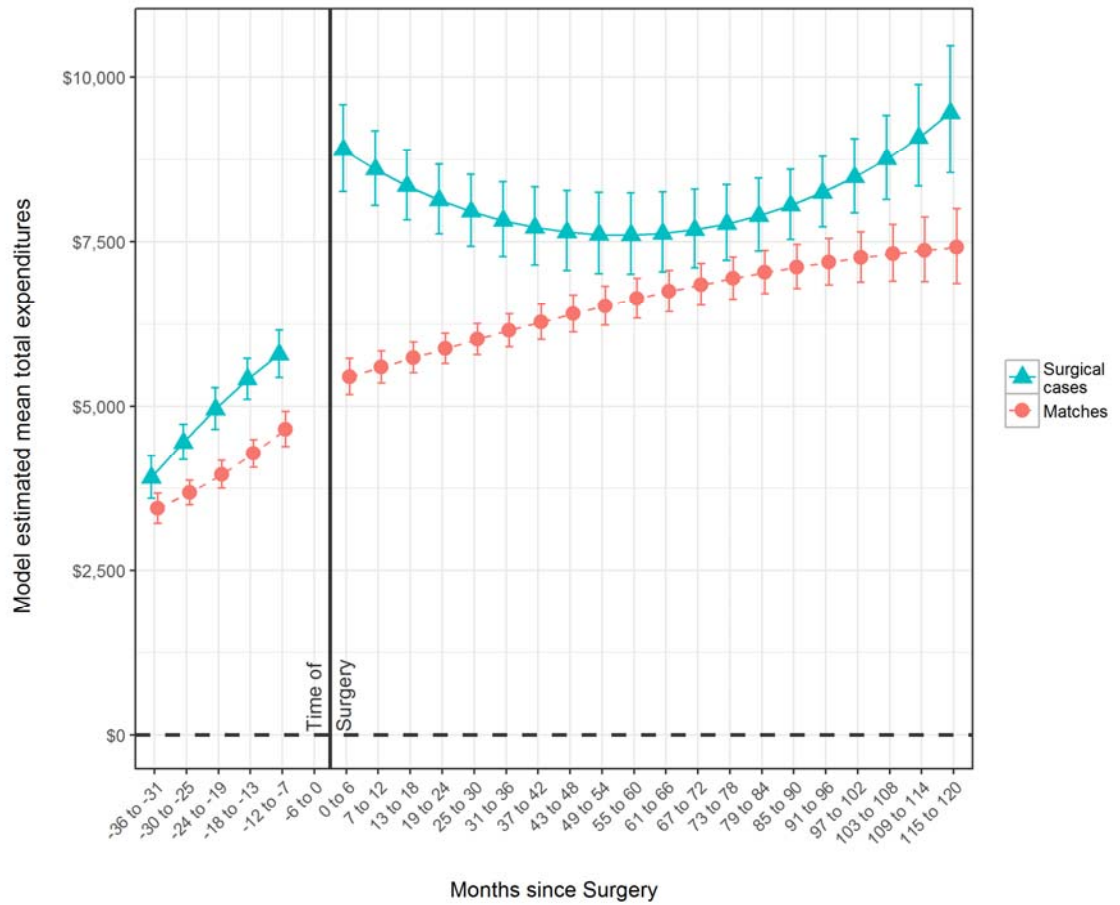

**eFigure 4.** Model-Estimated Trends Without Covariate Adjustment in Estimated Outpatient Expenditures for Surgical Patients and Nonsurgical Matches

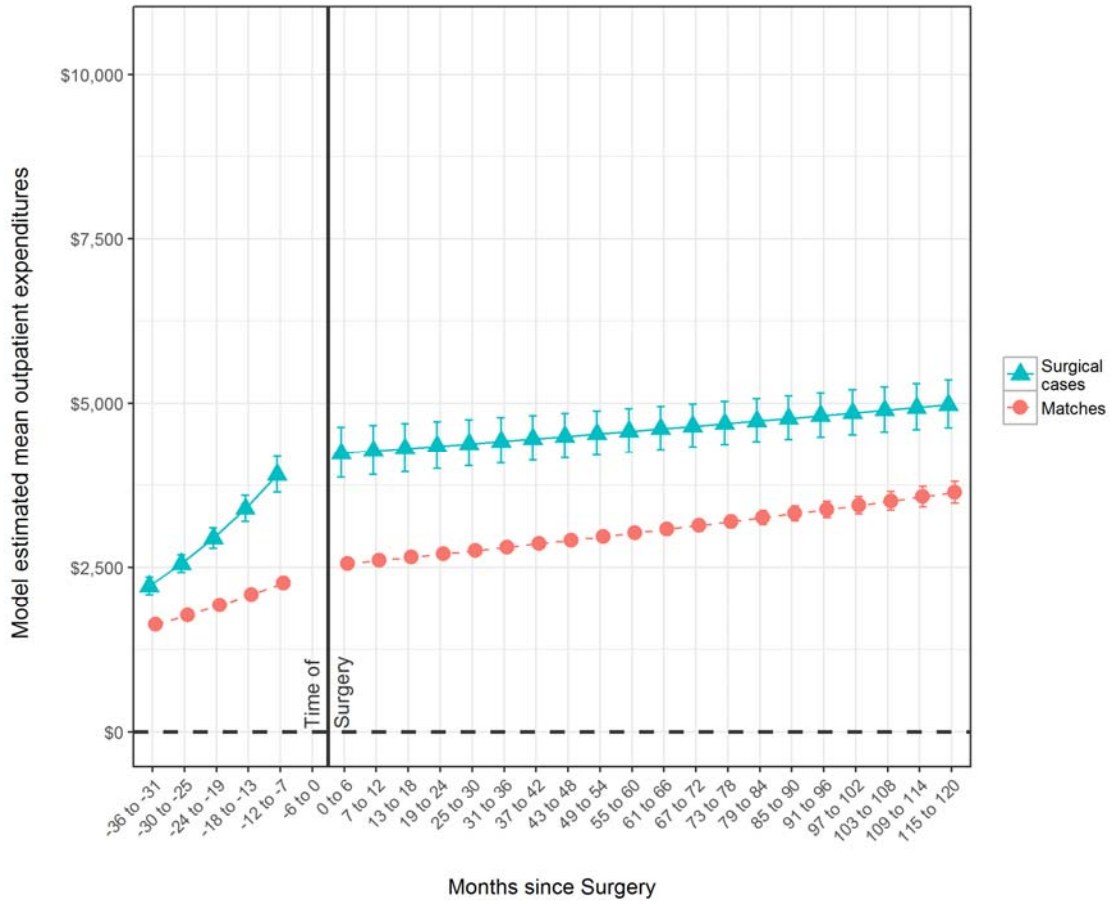

**eFigure 5.** Model-Estimated Trends Without Covariate Adjustment in Estimated Inpatient Expenditures for Surgical Patients and Nonsurgical Matches

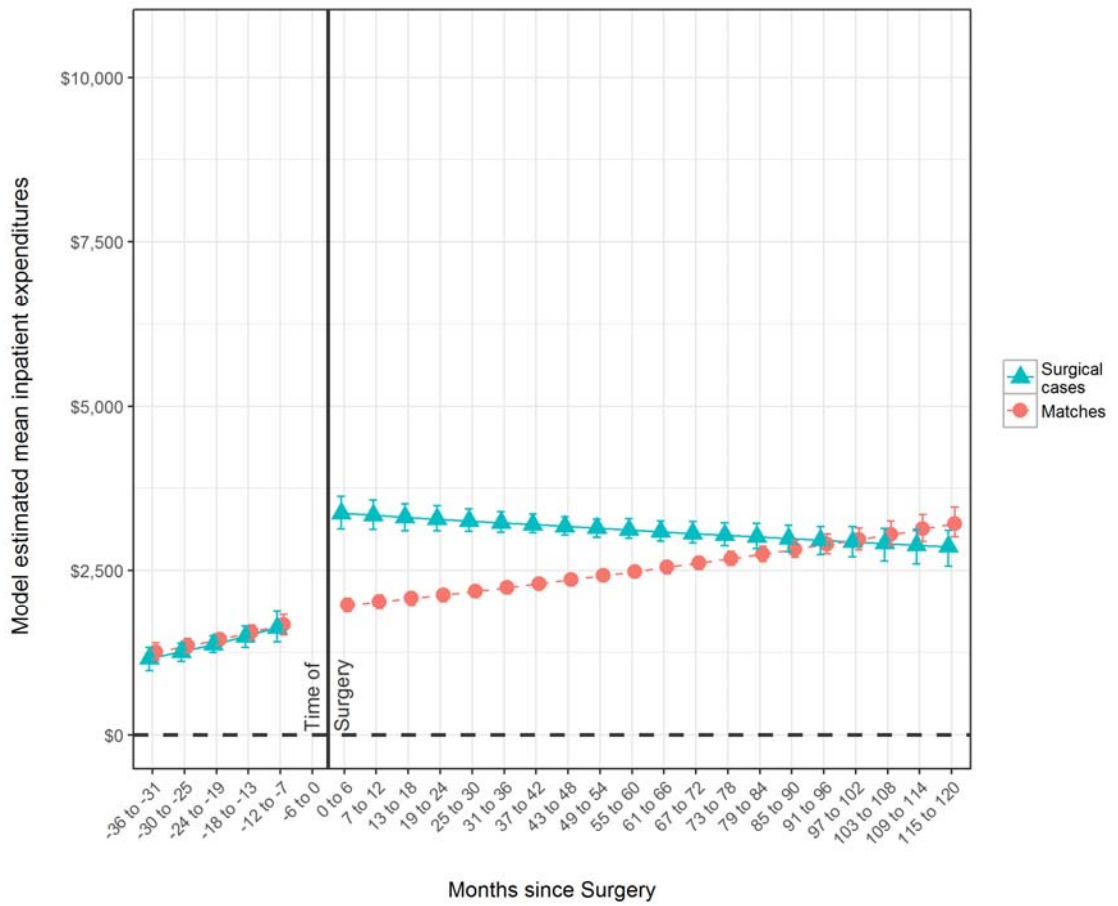

**eFigure 6.** Model-Estimated Trends Without Covariate Adjustment in Estimated Outpatient Pharmacy Expenditures for Surgical Patients and Nonsurgical Matches

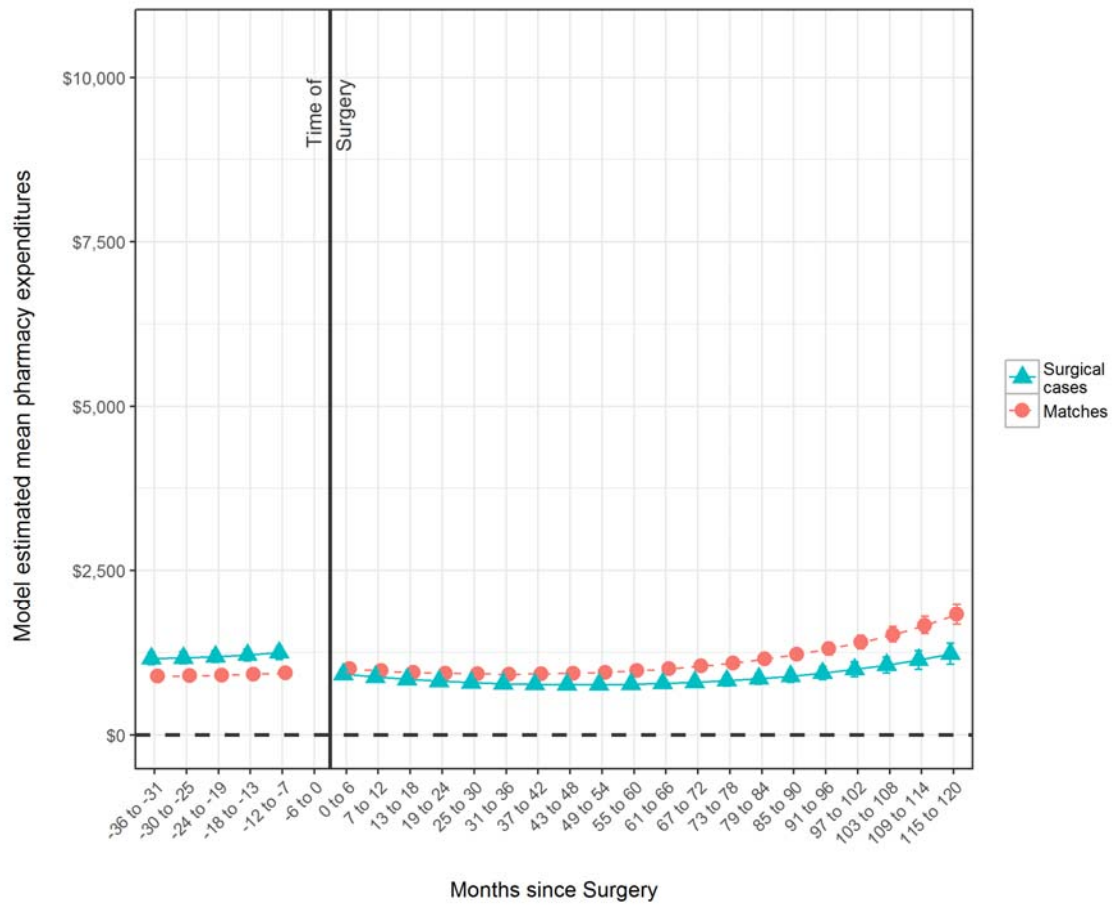



**eFigure 7.** Model-Estimated Trends in Estimated Postsurgical Total Expenditures for Surgical Patients and Nonsurgical Matches From a Model That Adjusts for Outpatient Expenditures 13-24 Months Prior to Surgery

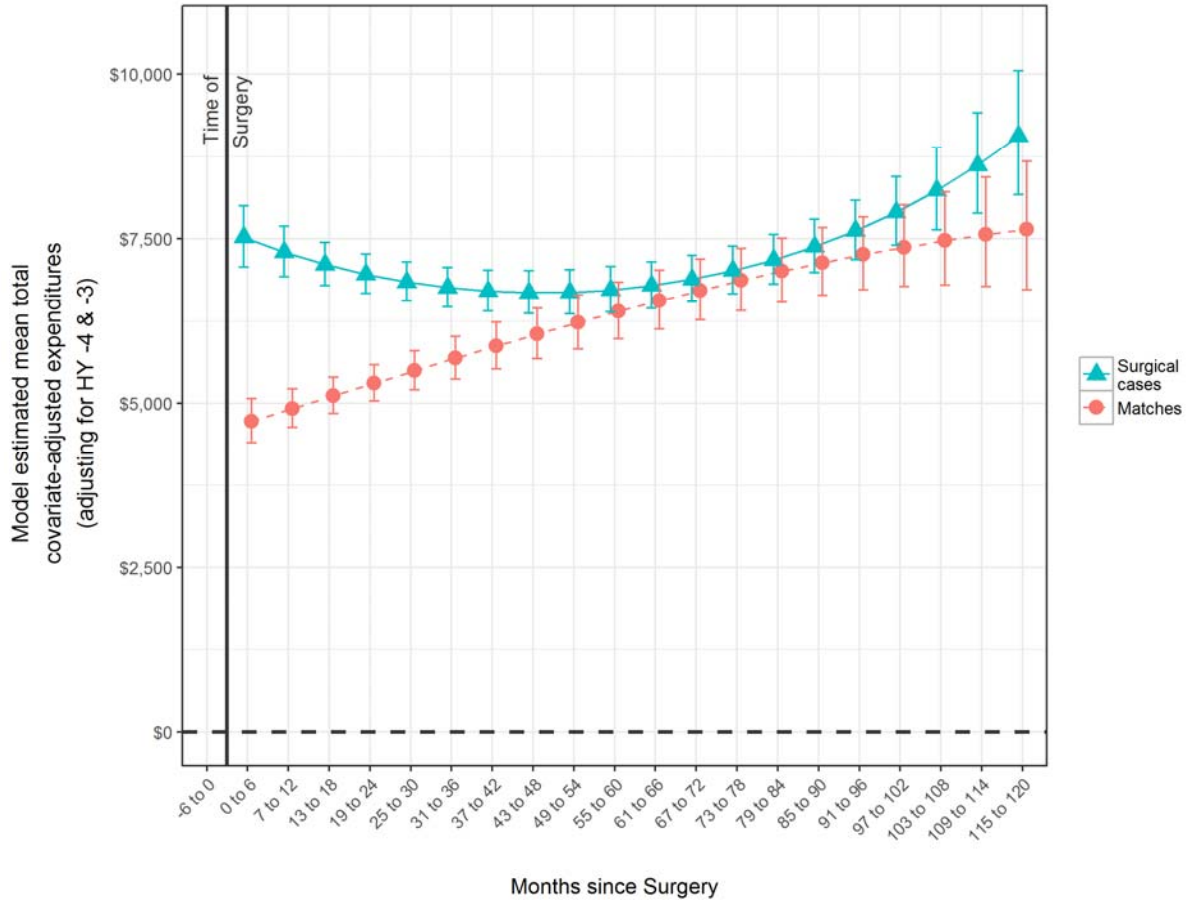

The model adjusted for the following baseline covariates: Age, BMI, DCG score, marital status, copayment status, and prevalence of 12 comorbidities (hypertension, dyslipidemia, arthritis, depression, coronary artery disease, gastroesophageal reflux disease, asthma, fatty liver disease, post-traumatic stress disorder, alcohol abuse, substance abuse, and schizophrenia) at baseline as well as total expenditures in the -13 to -18 and -19 to -24 months prior to surgery.

**eFigure 8.** Model-Estimated Trends in Estimated Total Expenditures for Surgical Patients and the Single Nonsurgical Match With the Closest Outpatient Expenditures 13-24 Months Prior to Surgery

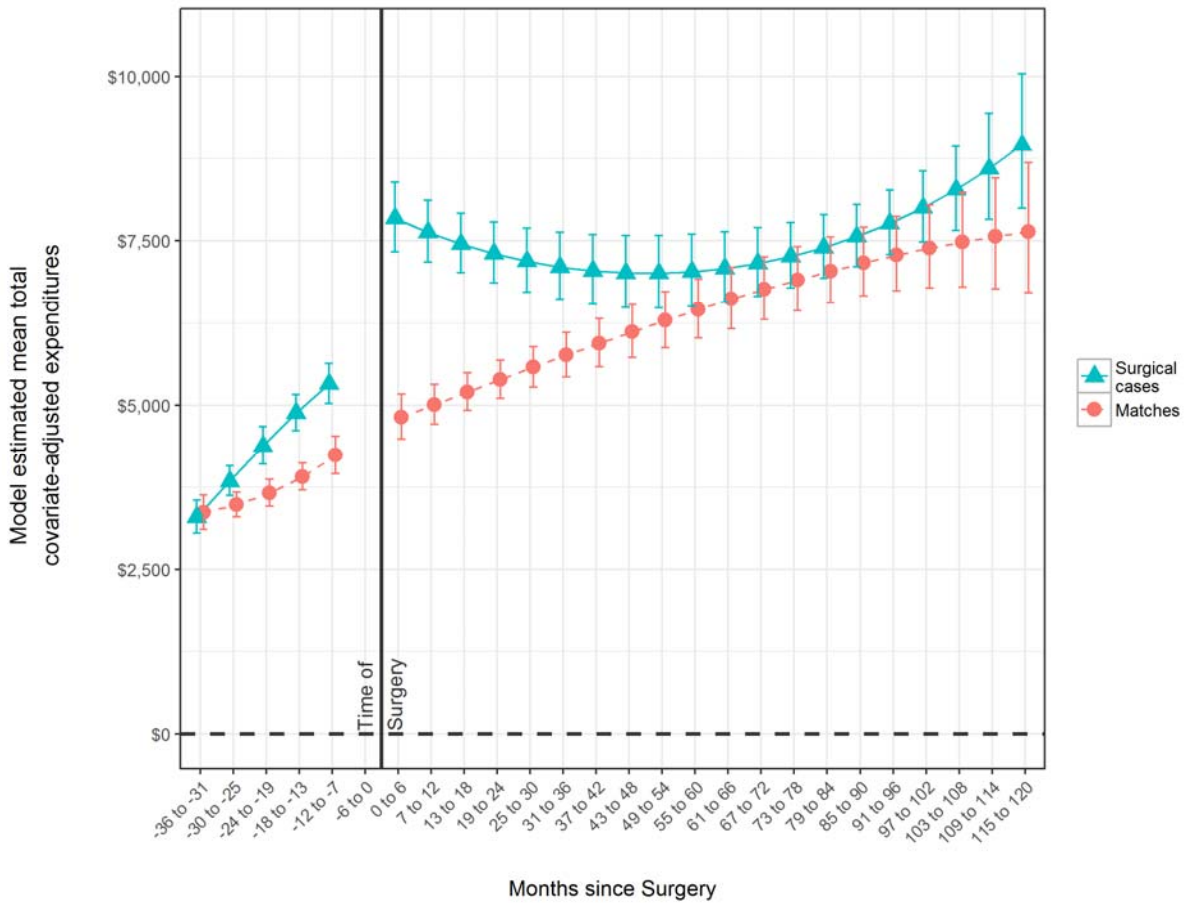

Note: The non-surgical match was chosen from the 3:1 matched risk sets for each surgical patient because he/she had outpatient expenditures 13-18 and 19-24 months prior to surgery that were closest to the outpatient expenditures of the matched surgical patient. The model adjusted for the following baseline covariates: Age, BMI, DCG score, marital status, copayment status, and prevalence of 12 comorbidities (hypertension, dyslipidemia, arthritis, depression, coronary artery disease, gastroesophageal reflux disease, asthma, fatty liver disease, post-traumatic stress disorder, alcohol abuse, substance abuse, and schizophrenia) at baseline.
